# Supplementary material
Source: PubMed Central journal article supplement (PMC3258931)
Supplement: supp_M801954200_SupplementalTable.pdf [file supp_M801954200_SupplementalTable.pdf]

Supplemental Table 1: Identified peptides of CcO subunit I after tryptic digest followed by cyanogens bromide cleavage

| m/z       | Peptide sequence          |
|-----------|---------------------------|
| 38.981    | WNTISSM                   |
| 1042.6619 | VGTALSLIR                 |
| 1225.185  | YSDYPDAYTM                |
| 1267.6682 | ISHIVTYYSK                |
| 1310.7143 | VFIIWEAFASK               |
| 1310.760  | VFIIWEAFASK               |
| 1381.842  | RYSYDPDAYTM               |
| 1466.924  | VFIIWEAFASKR              |
| 1562.971  | FINRWLFSTNHK              |
| 1585.816  | SQYQTPLFVWSVM             |
| 1754.8654 | MSIGFLGFIVWAHBM           |
| 1909.1806 | ITAVLLLLSLPVLAAGITM       |
| 1922.0496 | SFWLLPPSLLLLASSM          |
| 2115.0844 | VFSWLATLHGNIKWSPAM        |
| 2150.0741 | SIGFLGFIVWAHBMFTVGM       |
| 2281.1759 | NNMSFWLLPPSLLLLASSM       |
| 2651.4629 | DIGTLYLLFGAWAGMVGTLALSLIR |
